# Supplementary material for: Transport pathways of carbon monoxide from Indonesian fire pollution to a subtropical high-altitude mountain site in western North Pacific
Source: Copernicus journal article supplement (doi:10.5194/acp-2022-643), 2022-10-17
Supplement: Supplementary file [file acp-2022-643-AC2-supplement.pdf]

## Response to Reviewers:

The authors greatly appreciate the reviewers' constructive comments to further improve our manuscript's quality. We carefully considered each comment and revised our manuscript to address the issues raised. The original reviewer comments are in black and our replies are in blue. Text excerpts are italicized in *blue* with new text in **bold**.

### Response to **Reviewer #2**

This is an interesting study looking at the long range transport impacts on the observed enhancements in pollutants at the high altitude pollution monitoring station in Taiwan. It explains the challenges and significance of air pollution events which will disperse to a larger area. However, the manuscript needs some improvement to bring more clarity on the study. Specific points of concern are given below. In general English also needs a significant improvement (some in notified, but many I did not). This work can be accepted for the publication after the successful revision of the following points.

**Reply:** We highly appreciate the thoughtful and valuable suggestions by the reviewer, which are helpful for us to improve the quality of our manuscript. We have revised the manuscript with consideration of the reviewer's comments/suggestions. We have taken utmost care in the revised manuscript about English grammar and usage. The revised manuscript was thoroughly checked by English native speaker (SG; one of the co-author in the manuscript).

#### Specific concerns:

Lines 44-45: How do both extreme and weak El Niño events relate with forest fires, what is the basis here? This looks little contrasting to me. Weak El Niño should not result in extreme dry conditions and that would be non-conductive for fire events.

**Reply:** Based on the value of Nino 3.4, the 2006 El Niño was weak compared to the 2015 event. However, the Indian Ocean Dipole (IOD) was in a positive phase in both events and played an important role in causing dry conditions over the Maritime Continent. The roles of IOD and El Niño in fire activity over the Maritime continent have been well reported (Please see Pan et al., 2018 for more details). In, 2006, the combination of positive IOD and weak or moderate El Nino conditions impacted the fire activity. To avoid confusion, we have modified the sentence in the revised manuscript.

Please refer to Lines 44-46:

***“For example, dry conditions associated with the positive IOD during the 2015/16 El Niño and 2006/07 El Niño events led to increased fire activity over Indonesia and the wider MC.”***

Lines 50-51: Please check the grammar the sentence is grammatically not correct.

Line 51: Check the grammar

**Reply:** Corrected in the revised manuscript. Please refer to Lines 50-52:

*“The impact of these two Indonesian fire events on carbon emissions, tropospheric trace gases, aerosol composition, and air quality has been extensively discussed in the literature.”*

Lines 64 and 65: The average atmospheric life time of CO is two months and that of CH<sub>4</sub> is close to 12 years. Any episodic increase in CO may not have direct impact on average CH<sub>4</sub> atmospheric life time through OH radical chemistry because CO is prone for more local variations and so are OH radicals. Only sustained increase of CO in all the regions may cause that effect but it is very vague to state that, CO increase may increase the CH<sub>4</sub> life time through OH processing. Kindly bring more clarity on this statement.

**Reply:** We have modified the sentence in the revised manuscript. Please refer to Lines 67-69:

*“CO is also an ozone (O<sub>3</sub>) precursor in the troposphere, and indirectly increases radiative forcing (0.23 +/- 0.05 W m<sup>-2</sup>) through the production of O<sub>3</sub> and CO<sub>2</sub> and depletion of hydroxyl radical, the primary chemical reactant with CH<sub>4</sub> in the atmosphere (IPCC, 2013).”*

Line no. 74: I would suggest to give the site details separately. It has been merged with introduction which does not sync. You can revise the introduction by keeping the studies reported from LABS and objectives for this study. Bring out the site details along with more details on local meteorology in a separate section. Local meteorology at the study site is missing and would be needed for the reader to understand your results.

**Reply:** Thanks for the nice suggestion. We have included the site details separately (Sec. 2.1) in the revised manuscript. Details of the various meteorological measurements at LABS have been previously described in detail (Sheu et al., 2009; Ou-Yang et al., 2014; Ravindra Babu et al., 2022) and are thus only briefly described in the present study. We included the meteorological conditions at the study location based on in-situ measurements from 2006 to 2021 and provided them in the supplementary figures. The figure (sup. Figure 1 in the revised manuscript) below shows the climatological monthly mean of various meteorological parameters at LABS along with the MERRA-2 boundary layer height around LABS.

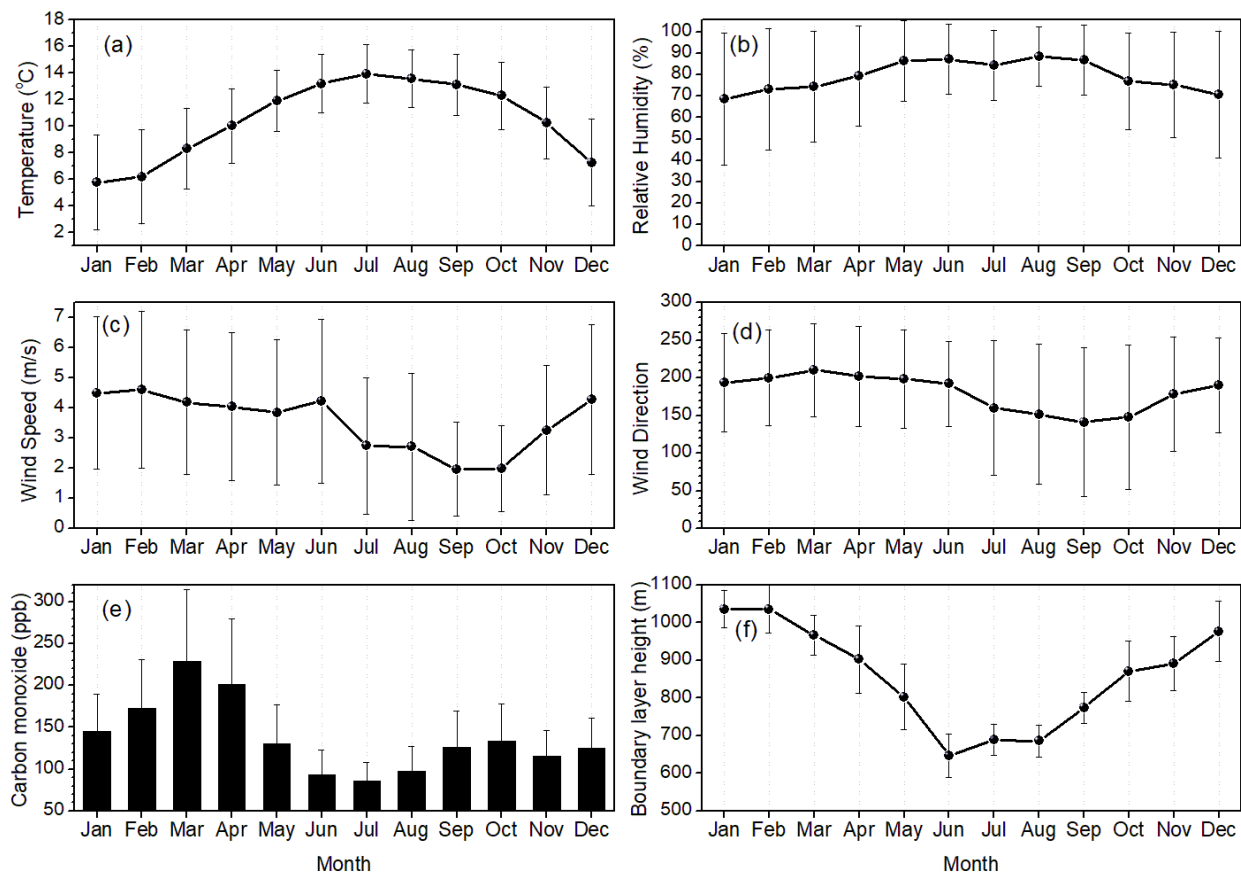

**Figure S1.** Long-term monthly mean of (a) temperature, (b) relative humidity, (c) wind speed, (d) wind direction, (e) carbon monoxide at LABS, and (f) MERRA-2 obtained boundary layer height around LABS between 2006 and 2021. Vertical error bars indicate the standard deviation from the monthly mean.

Line 79: “The LABS is often found within the free troposphere”. Again the statement is very vague. Please try to show the ABL height in reference to the station height for different seasons. The ABL height plays an important role in the interpretation of long range transport and local emissions. Measurements of CO experience boundary layer local emission effects if the station is within boundary layer. This should be considered carefully while deciding the effect of long-range transport. Further the site looks to be in between dense forest region how do you remove the local forest fire event effects from the long range transport from Indonesia?

**Reply:** ABL height information is not available at LABS from in-situ measurements. However, the MERRA-2 boundary layer height around LABS was obtained between 2001 to 2021 and plotted along with the various meteorological parameters at LABS. Please see Figure S1f above.

Regarding local fire activity around the study location, we further checked the MODIS fire counts over Taiwan during the 2006 and 2015 events. Please see the attached Figure R4 for the spatial distribution of MODIS fire counts over Taiwan. It is very clear that the local fire activity around the study location was negligible in both events. We also compared the total fire counts in Indonesia with the total fire counts in Taiwan in both events. For example, the total number of

MODIS fire counts for Indonesia on October 2006 is >40000, whereas it is only 9 for Taiwan. Similarly, in October 2015, the total MODIS fire counts in Indonesia was >50000 whereas for Taiwan it was only 3. Also, the fire counts were mostly having confidence level below 80 in both events (see the Table R1).

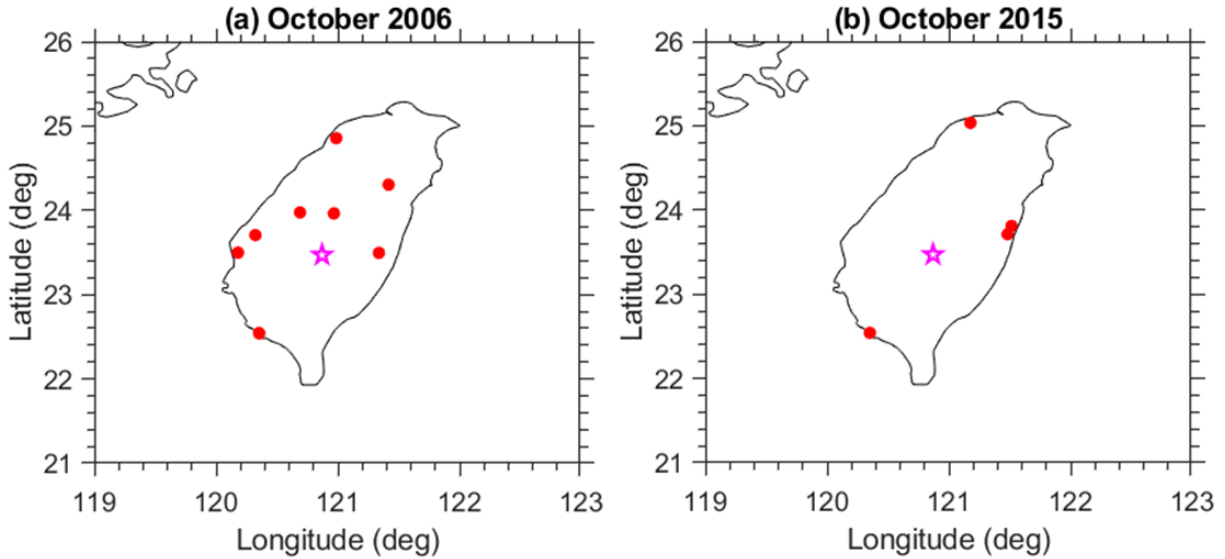

**Figure R1.** MODIS fire hot spots are shown as red dots on (a) October 2006, and (b) October 2015. Magenta-colored star symbol represents the LABS location.

**Table R1.** Details of MODIS fire counts during October 2006 and 2015.

| Latitude | Longitude | Day number | Year | Confidence |
|----------|-----------|------------|------|------------|
| 23.9631  | 120.967   | 3          | 2006 | 64         |
| 24.3039  | 121.416   | 7          | 2006 | 58         |
| 23.7057  | 120.322   | 14         | 2006 | 77         |
| 22.5443  | 120.3525  | 15         | 2006 | 62         |
| 23.4975  | 120.1791  | 18         | 2006 | 59         |
| 22.5383  | 120.3544  | 22         | 2006 | 64         |
| 23.4946  | 121.3367  | 23         | 2006 | 39         |
| 24.856   | 120.9863  | 25         | 2006 | 53         |
| 23.9743  | 120.6893  | 29         | 2006 | 58         |
|          |           |            |      |            |
| 23.7126  | 121.4815  | 3          | 2015 | 57         |
| 23.8096  | 121.5147  | 5          | 2015 | 43         |
| 22.5404  | 120.3508  | 8          | 2015 | 78         |
| 25.0337  | 121.177   | 13         | 2015 | 53         |

Lines 102-103: What is the CO trend in 16 years? Have you considered the trend while estimating the enhancement during 2006 and 2015? Because long term CO may have natural variability (deseasoned) in its mean and that needs to be removed while calculating the enhancement.

**Reply:** Yes, we agree with the reviewer that there might be natural variability in CO data. However, we have subtracted 16-year mean data from 2006 and 2015 individual data. So any natural variability will be nullified. There is decreasing trend in CO at LABS during last 16 years.

Line 129: first line indent is not followed here.

**Reply:** Corrected in the revised manuscript. Please refer to Lines 160-162:

*“We also utilized monthly mean geopotential height (GPH), wind vectors (zonal and meridional wind speed), and pressure vertical velocity from the Modern-Era Retrospective Analysis for Research and Applications, version 2 (MERRA-2).”*

Figure 2: What is the natural trend of CO over the years removing the episodic events? How do you separate the natural variability with episodic enhancements due to forest fires? If the more fire activity is bringing more CO then why year 2014 has not shown any enhancement even through fire activity and Niño 3.4 are comparatively high. Same is the case in the year 2009.

**Reply:** We have subtracted 16-year mean data from 2006 and 2015 individual data. So any natural variability will be nullified. At LABS, we observed decreasing trend in CO during 2006 to 2021.

Please see Figure 2 in the revised manuscript. The height-time cross-section of CO over the Maritime Continent (MC) clearly shows the extreme CO values in 2006 and 2015. Even though 2009 and 2014 were El Niño years, the CO over MC was not high as observed in 2006 and 2015. The weaker and shorter duration of fire activities could largely explain the less CO over MC in 2009 and 2014 in contrast to those in 2006 and 2015.

Figure 3: This correlation is drawn for which pressure level of satellite data?. In situ measurements are point measurements at the surface whereas, satellite data are area averaged and column integrated. If the columnar area averaged data are used will it represent the true scenario of LABS? And the further interpretation of enhancement is logical? The clarity is missing here. This is important because satellite may have picked the local fire event enhancements too. It would be better to incorporate a fire event intensity distribution diagrams (for the years 2006 and 2015) around the LABS site and then overlap air mass trajectories (use of polar plots may help) receiving at the site to see the real influence of the detected fire events. This should normally correlate with the enhancement. After establishing this relationship dynamics can be explained.

**Reply:** We are sorry for not mentioning the pressure level which we used CO data from the satellite measurements. Actually, we used 700 hPa (close to LABS’s altitude) CO data from both satellites and made correlations in the present study. We have included this in the revised manuscript.

We also checked the fire hot spots over Taiwan in October 2006 and 2015 from MODIS fire products. Please see the attached Figure R4 for clarity. It is very clear that there is negligible fire activity over entire Taiwan in both events. Also, there is no fire activity near the LABS location in both events. This clearly indicates there is no local fire activity impact on CO measurements at

LABS in both events. Also, the background circulations from the present study (see the manuscript) clearly supported the long-range transport of CO from the MC to the LABS location.

Lines 218-219: Did you subtract the 2006 and 2015 data from long term mean of MOPITT CO observations or the other way around? You were looking for the enhancements, then long term mean should be subtracted from 2006 and 2015 data to see the magnitude of enhancement. Please reverify this statement.

**Reply:** Yes, long-term mean was subtracted from the 2006 and 2015 data.

Line 224: What is the uncertainty of MERRA-2 reanalysis data and how significant it is in your interpretation of impact of GpH and wind distribution while explaining the transport pathways?

**Reply:** Reanalysis products are the result of the assimilation of observations from different sources into an atmospheric model that generates evenly distributed global data. MERRA-2 (Molod et al 2015) is the most recent reanalysis produced by NASA's Global Modelling and Assimilation Office (GMAO). It uses the Goddard Earth Observing System-5 (GEOS-5) atmospheric general circulation model (AGCM) with a 4D-VAR data assimilation scheme. We are not aware of the uncertainty of MERRA-2 reanalysis data.

To clarify this, we cross-checked the geopotential height and wind data from NCEP-DOE Reanalysis-2 and ERA-5. Figure R2 shows the monthly mean Geopotential height (GpH) obtained from (a) NCEP/DOE Reanalysis II, (b) ERA-5, and (c) MERRA-2 reanalysis for October 2006. The three reanalysis shows quite a similar pattern in GpH (presence of anti-cyclonic circulation over the South China Sea) and wind pattern in October 2006. Even if there is uncertainty as raised by the reviewer in GpH data from MERRA-2, it will not affect our main results in the present study. All the reanalysis GpH and wind patterns clearly indicated the presence of anti-cyclonic circulation with a high-pressure system over the south china sea in October 2006. This provides us with strong confidence in our results. Please see the below attached Figure R2, respectively.

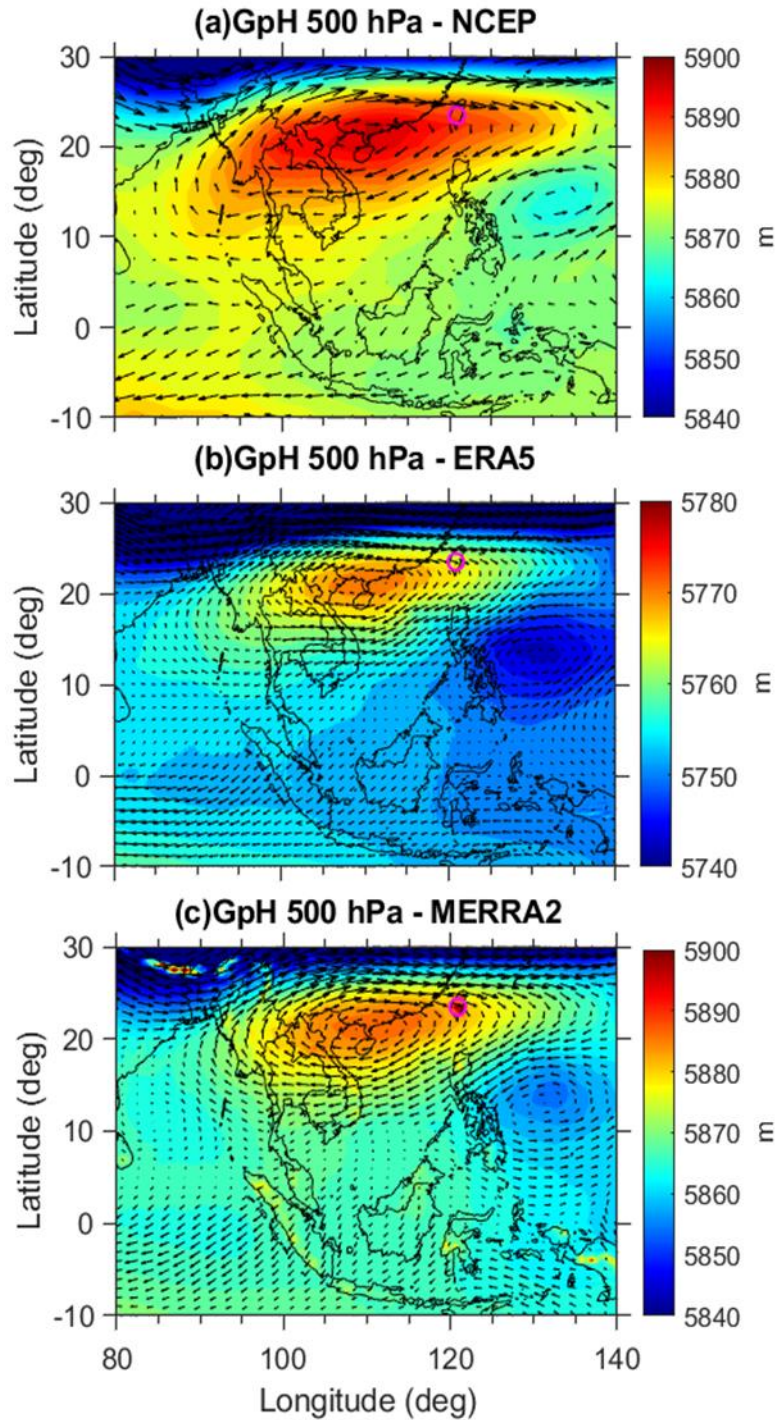

**Figure R2.** Monthly mean Geopotential height (GpH) obtained from (a) NCEP/DOE Reanalysis II, (b) ERA-5, and (c) MERRA-2 reanalysis for October 2006.

Lines 290-291: What is the time scale of CO transportation form the source region to the observational site via meridional transport?. Whether it fits observed changes?

**Reply:** Based on available observations from the present study, it is quite difficult to tell the time scale for transportation from the source region to the receptor site. It needs more detailed modeling

and numerical simulations. In this work, our major goals are to investigate the plausible transport pathways of CO from the maritime continent to sub-tropical high-altitude locations. In future studies, we will look at this interesting question raised by the reviewer.

**Summary and Conclusions:** It looks more like a discussion rather than conclusion. Please bring crisp 4-5 salient points of this study in conclusion. Figure 10 and related content can go as a discussion. It does not sync again in summary and conclusion.

**Reply:** We have modified the conclusion section as suggested.

## References

Pan, X., Chin, M., Ichoku, C. M., and Field, R. D.: Connecting Indonesian fires and drought with the type of El Niño and phase of the Indian Ocean dipole during 1979–2016, *J. Geophys. Res.-Atmos.*, 123, 1–15, <https://doi.org/10.1029/2018JD028402>, 2018.

Sheu, G.-R., Lin, N.-H., Wang, J.-L., Lee, C.-T.; Lulin Atmospheric Background Station: A New High-Elevation Baseline Station in Taiwan, *J-STAGE*, Volume 24, Issue 2, Pages 84-89, <https://doi.org/10.11203/jar.24.84>, 2009.

Ou-Yang, C. F., Lin, N. H., Lin, C. C., Wang, S. H., Sheu, G. R., Lee, C. Te, Schnell, R. C., Lang, P. M., Kawasato, T. and Wang, J. L.: Characteristics of atmospheric carbon monoxide at a high-mountain background station in East Asia, *Atmos. Environ.*, 89, 613–622, <https://doi.org/10.1016/j.atmosenv.2014.02.060>, 2014.

Ravindra Babu, S., Pani, S.K., Ou-Yang, C.F., Lin, N.H.: Impact of 21 June 2020 Annular Solar Eclipse on Meteorological Parameters, O<sub>3</sub> and CO at a High Mountain Site in Taiwan. *Aerosol Air Qual. Res.* 22, 220248. <https://doi.org/10.4209/aaqr.220248>, 2022.
